# Supplementary material for: Simultaneous Detection of Porcine Respiratory Coronavirus, Porcine Reproductive and Respiratory Syndrome Virus, Swine Influenza Virus, and Pseudorabies Virus via Quadruplex One-Step RT-qPCR
Source: MDPI journal article supplement (doi:10.3390/pathogens13040341), 2024-04-19
Supplement: s1 [file s1]

# Supplementary Figure S1

## A. PRCoV

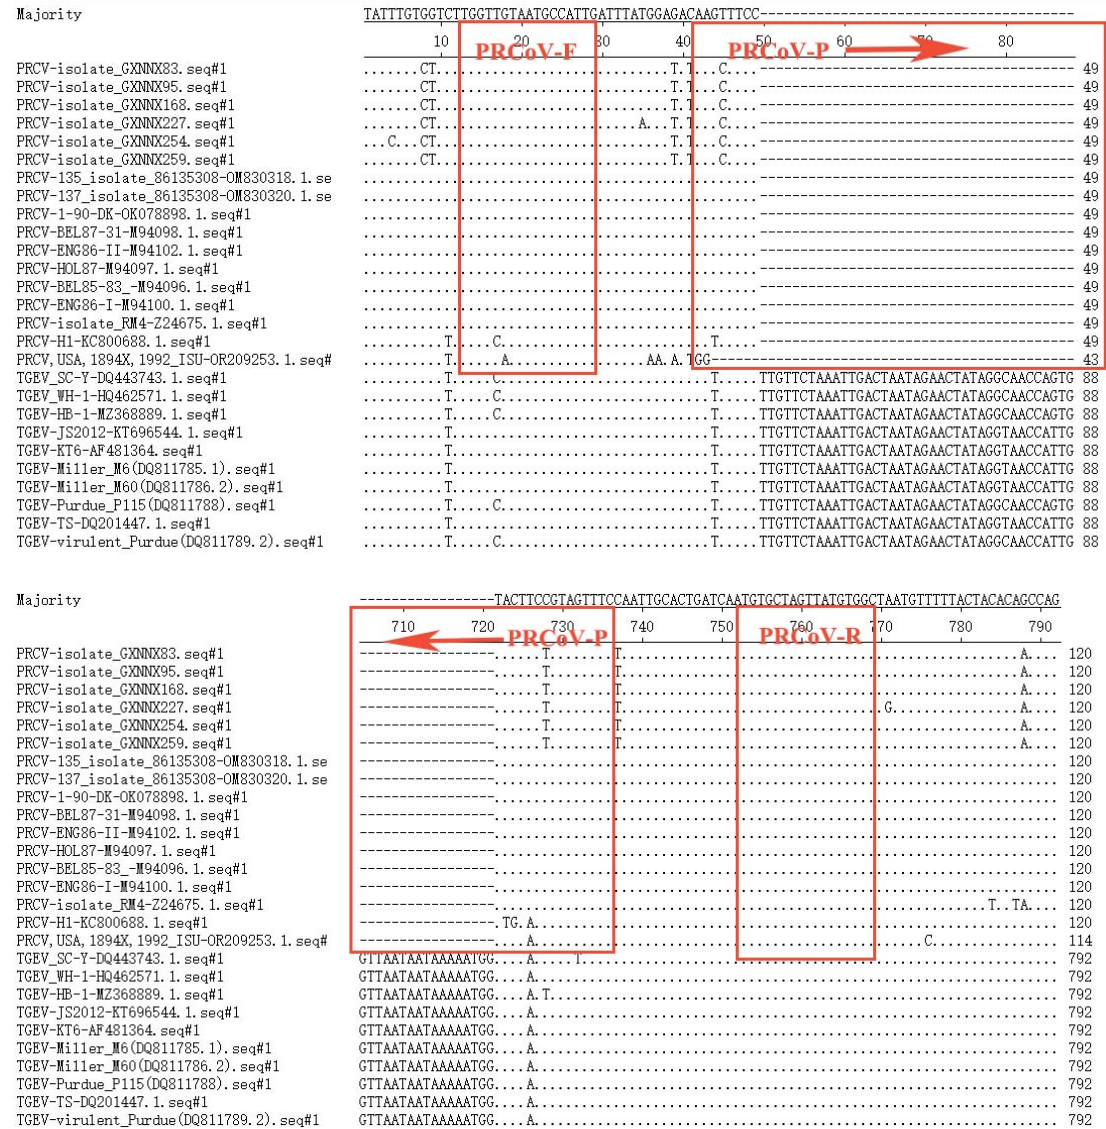

|                            | 460 | 470 | 480 | 490 | 500 | 510 | 520 | 530 | 540 | 550 | 560 | 570 | 580 | 590 | 600 |
|----------------------------|-----|-----|-----|-----|-----|-----|-----|-----|-----|-----|-----|-----|-----|-----|-----|
| VR-2332-AY150564.seq       | ..A | ..A | ..G |
| RespPFRS_HLV-AF066183.seq  | ..A | ..A | ..G |
| QTTZ-QJ008796.seq          | ..A | ..A | ..G |
| UrbA1-1-EF704734.seq       | ..A | ..A | ..G |
| TJ-EU860248.seq            | ..A | ..A | ..G |
| BJ-4-AF331831.seq          | ..A | ..A | ..G |
| CH-1a-AY032626.seq         | ..A | ..A | ..G |
| IR-IR-EU807840.seq         | ..A | ..A | ..G |
| FRTZ-FG99476.seq           | ..A | ..A | ..G |
| QME-WN064242.seq           | ..A | ..A | ..G |
| Henn-A14-K8119936.seq      | ..A | ..A | ..G |
| HN1-AY457635.seq           | ..A | ..A | ..G |
| HUN4-EF635006.seq          | ..A | ..A | ..G |
| JXAI-EF112445.seq          | ..A | ..A | ..G |
| U006-EF416101.seq          | ..A | ..A | ..G |
| MLB4-EF442777.seq          | ..A | ..A | ..G |
| SY0608-EU144079.seq        | ..A | ..A | ..G |
| WU11-EU187484.seq          | ..A | ..A | ..G |
| GD-2011-KC527830.seq       | ..A | ..A | ..G |
| Henn-1-EU200962.seq        | ..A | ..A | ..G |
| W-ETU0902.seq              | ..A | ..A | ..G |
| HB1-EF075945.seq           | ..A | ..A | ..G |
| SHI-EU106888.seq           | ..A | ..A | ..G |
| XDu-1-KF815525.seq         | ..A | ..A | ..G |
| NAD31-WN660150.seq         | ..A | ..A | ..G |
| MDG262.seq                 | C   | C   | C   | C   | C   | C   | C   | C   | C   | C   | C   | C   | C   | C   | C   |
| NVC-MN3-KC492503.seq       | C   | C   | C   | C   | C   | C   | C   | C   | C   | C   | C   | C   | C   | C   | C   |
| Olot_91-EF203132.seq       | C   | C   | C   | C   | C   | C   | C   | C   | C   | C   | C   | C   | C   | C   | C   |
| BJEU06-1-GU047344.seq      | C   | C   | C   | C   | C   | C   | C   | C   | C   | C   | C   | C   | C   | C   | C   |
| DCD-2003-7-2-KC862572.seq  | C   | C   | C   | C   | C   | C   | C   | C   | C   | C   | C   | C   | C   | C   | C   |
| lenk-JF802085.seq          | C   | C   | C   | C   | C   | C   | C   | C   | C   | C   | C   | C   | C   | C   | C   |
| AYV9-2003-2-1-KC492503.seq | C   | C   | C   | C   | C   | C   | C   | C   | C   | C   | C   | C   | C   | C   | C   |
| SD1-08-DQ489311.seq        | C   | C   | C   | C   | C   |     |     |     |     |     |     |     |     |     |     |

2

## C. SIV

|               | 150 | 170 | 180 | 190 | 200 | 210 | 220 | 230 | 240 | 250 | 260 | 270 | 280 | 290 | 300 |     |
|---------------|-----|-----|-----|-----|-----|-----|-----|-----|-----|-----|-----|-----|-----|-----|-----|-----|
| HM418813.1    |     | T   |     |     |     |     |     |     |     |     |     |     |     |     |     | 275 |
| HM418810.1    |     | T   |     |     |     |     |     |     |     |     |     |     |     |     |     | 275 |
| CY037970.1    |     | G   |     |     |     |     |     |     |     |     |     |     |     |     |     | 275 |
| CY038026.1    |     |     |     |     |     |     |     |     |     |     |     |     |     |     |     | 275 |
| CY038010.1    |     | G   |     |     |     |     |     |     |     |     |     |     |     |     |     | 275 |
| MG859263.1    |     | G   |     |     |     |     |     |     |     |     |     |     |     |     |     | 275 |
| KP404295.1    |     | G   |     |     |     |     |     |     |     |     |     |     |     |     |     | 275 |
| HQ659665.1    |     | G   |     |     |     |     |     |     |     |     |     |     |     |     |     | 275 |
| JM809214.1    |     | G   |     |     |     |     |     |     |     |     |     |     |     |     |     | 275 |
| KT943584.1    |     | T   |     |     |     |     |     |     |     |     |     |     |     |     |     | 276 |
| FN415612.1    |     | G   |     |     |     |     |     |     |     |     |     |     |     |     |     | 275 |
| AB704481.1    |     | G   |     |     |     |     |     |     |     |     |     |     |     |     |     | 275 |
| GQ225376.1    |     | T   |     |     |     |     |     |     |     |     |     |     |     |     |     | 275 |
| CY086001.2    |     |     |     |     |     |     |     |     |     |     |     |     |     |     |     | 279 |
| KF530311.1    |     |     |     |     |     |     |     |     |     |     |     |     |     |     |     | 275 |
| EU798808.1    |     |     |     |     |     |     |     |     |     |     |     |     |     |     |     | 275 |
| CY002353.1    |     | T   |     |     |     |     |     |     |     |     |     |     |     |     |     | 300 |
| EU050625.1    |     |     |     |     |     |     |     |     |     |     |     |     |     |     |     | 275 |
| EU258944.1    |     |     |     |     |     |     |     |     |     |     |     |     |     |     |     | 283 |
| EU258938.1    |     |     |     |     |     |     |     |     |     |     |     |     |     |     |     | 281 |
| HM830589.1    |     | T   |     |     |     |     |     |     |     |     |     |     |     |     |     | 275 |
| KC471404.1    |     | T   |     |     |     |     |     |     |     |     |     |     |     |     |     | 275 |
| MZ945789.1    |     | G   |     |     |     |     |     |     |     |     |     |     |     |     |     | 300 |
| KM892791.1    |     | A   |     |     |     |     |     |     |     |     |     |     |     |     |     | 275 |
| NP045223.1 TC |     |     |     |     |     |     |     |     |     |     |     |     |     |     |     | 275 |
| HW170190.1    |     | A   |     |     |     |     |     |     |     |     |     |     |     |     |     | 275 |
| EU798812.1    |     |     |     |     |     |     |     |     |     |     |     |     |     |     |     | 275 |
| EU655696.1    |     |     |     |     |     |     |     |     |     |     |     |     |     |     |     | 300 |
| KM029738.1    |     |     |     |     |     |     |     |     |     |     |     |     |     |     |     | 275 |
| KM028498.1    |     | T   |     |     |     |     |     |     |     |     |     |     |     |     |     | 275 |
| KM028482.1    |     | T   |     |     |     |     |     |     |     |     |     |     |     |     |     | 275 |
| HM440140.1    |     |     |     |     |     |     |     |     |     |     |     |     |     |     |     | 275 |
| HM440132.1    |     | G   |     |     |     |     |     |     |     |     |     |     |     |     |     | 275 |
| KM028002.1    |     | G   |     |     |     |     |     |     |     |     |     |     |     |     |     | 275 |
| KC883529.1    |     |     |     |     |     |     |     |     |     |     |     |     |     |     |     | 275 |
| KM028506.1    |     | G   |     |     |     |     |     |     |     |     |     |     |     |     |     | 275 |
| MT265029.1    |     | G   |     |     |     |     |     |     |     |     |     |     |     |     |     | 275 |
| HM998925.1    |     | A   |     |     |     |     |     |     |     |     |     |     |     |     |     | 300 |
| KC421153.1    |     |     |     |     |     |     |     |     |     |     |     |     |     |     |     | 275 |
| HM998917.1    |     | G   |     |     |     |     |     |     |     |     |     |     |     |     |     | 300 |

## D. PRV

| Majority                  | 430 | 440 | 450 | 460 | 470 | 480 | 490 | 500 | 510 | 520 | 530 | 540 | 550 | 560 | 570 | 580 | 590 | 600 | 610 |
|---------------------------|-----|-----|-----|-----|-----|-----|-----|-----|-----|-----|-----|-----|-----|-----|-----|-----|-----|-----|-----|
| BC148-JF797217 seq        |     |     |     |     |     |     |     |     |     |     |     |     |     |     |     |     |     |     |     |
| ExpLw-JB090325 seq        |     |     |     |     |     |     |     |     |     |     |     |     |     |     |     |     |     |     |     |
| KIA3-DK000059 seq         |     |     |     |     |     |     |     |     |     |     |     |     |     |     |     |     |     |     |     |
| MB17-MT049637 seq         |     |     |     |     |     |     |     |     |     |     |     |     |     |     |     |     |     |     |     |
| Fa-HM189913 seq           |     |     |     |     |     |     |     |     |     |     |     |     |     |     |     |     |     |     |     |
| Ex-HM15430 seq            |     |     |     |     |     |     |     |     |     |     |     |     |     |     |     |     |     |     |     |
| Becker-JF797219 seq       |     |     |     |     |     |     |     |     |     |     |     |     |     |     |     |     |     |     |     |
| SC-KT090429 seq           |     |     |     |     |     |     |     |     |     |     |     |     |     |     |     |     |     |     |     |
| HM201-MT72022 seq         |     |     |     |     |     |     |     |     |     |     |     |     |     |     |     |     |     |     |     |
| HM1-HM189912 seq          |     |     |     |     |     |     |     |     |     |     |     |     |     |     |     |     |     |     |     |
| LS0-12019-MT469550 seq    |     |     |     |     |     |     |     |     |     |     |     |     |     |     |     |     |     |     |     |
| JS-2012-EP257591 seq      |     |     |     |     |     |     |     |     |     |     |     |     |     |     |     |     |     |     |     |
| JS-2012-EP15940 seq       |     |     |     |     |     |     |     |     |     |     |     |     |     |     |     |     |     |     |     |
| JT-KM080453 seq           |     |     |     |     |     |     |     |     |     |     |     |     |     |     |     |     |     |     |     |
| S018-MT049636 seq         |     |     |     |     |     |     |     |     |     |     |     |     |     |     |     |     |     |     |     |
| SM-KM080459 seq           |     |     |     |     |     |     |     |     |     |     |     |     |     |     |     |     |     |     |     |
| TJ-KT789182 seq           |     |     |     |     |     |     |     |     |     |     |     |     |     |     |     |     |     |     |     |
| ZJ01-MD061390 seq         |     |     |     |     |     |     |     |     |     |     |     |     |     |     |     |     |     |     |     |
| HL14-08-MD060259 seq      |     |     |     |     |     |     |     |     |     |     |     |     |     |     |     |     |     |     |     |
| GD30A-MD060251 seq        |     |     |     |     |     |     |     |     |     |     |     |     |     |     |     |     |     |     |     |
| GT-KM080452 seq           |     |     |     |     |     |     |     |     |     |     |     |     |     |     |     |     |     |     |     |
| HB1201-MD057088 seq       |     |     |     |     |     |     |     |     |     |     |     |     |     |     |     |     |     |     |     |
| HA01-MD080534 seq         |     |     |     |     |     |     |     |     |     |     |     |     |     |     |     |     |     |     |     |
| HL36-MD084771 seq         |     |     |     |     |     |     |     |     |     |     |     |     |     |     |     |     |     |     |     |
| HMV-MD03371 seq           |     |     |     |     |     |     |     |     |     |     |     |     |     |     |     |     |     |     |     |
| HR-ZZ-MD021401 seq        |     |     |     |     |     |     |     |     |     |     |     |     |     |     |     |     |     |     |     |
| JS-2012-F50-MD051316 seq  |     |     |     |     |     |     |     |     |     |     |     |     |     |     |     |     |     |     |     |
| JS-2012-F120-MD050842 seq |     |     |     |     |     |     |     |     |     |     |     |     |     |     |     |     |     |     |     |
| LC-MF434035 seq           |     |     |     |     |     |     |     |     |     |     |     |     |     |     |     |     |     |     |     |
| MF-KM080455 seq           |     |     |     |     |     |     |     |     |     |     |     |     |     |     |     |     |     |     |     |
| Wavyangjeu-Q0355658 seq   |     |     |     |     |     |     |     |     |     |     |     |     |     |     |     |     |     |     |     |
| qila647-KM18918 seq       |     |     |     |     |     |     |     |     |     |     |     |     |     |     |     |     |     |     |     |
| TA2-MD022324 seq          |     |     |     |     |     |     |     |     |     |     |     |     |     |     |     |     |     |     |     |
| 9-MF01-MF040038 seq       |     |     |     |     |     |     |     |     |     |     |     |     |     |     |     |     |     |     |     |
| Xi seq A-MT710801 seq     |     |     |     |     |     |     |     |     |     |     |     |     |     |     |     |     |     |     |     |
| B-GII-AF057079 seq        |     |     |     |     |     |     |     |     |     |     |     |     |     |     |     |     |     |     |     |
| FJ-2015-MF0405136 seq     |     |     |     |     |     |     |     |     |     |     |     |     |     |     |     |     |     |     |     |
| FJ-TJ25-MD010410 seq      |     |     |     |     |     |     |     |     |     |     |     |     |     |     |     |     |     |     |     |
| MDL-2012-MD0451219 seq    |     |     |     |     |     |     |     |     |     |     |     |     |     |     |     |     |     |     |     |
| MD2-MF040098 seq          |     |     |     |     |     |     |     |     |     |     |     |     |     |     |     |     |     |     |     |
| HLJ-015-MD048958 seq      |     |     |     |     |     |     |     |     |     |     |     |     |     |     |     |     |     |     |     |
| HR-KI-MD021400 seq        |     |     |     |     |     |     |     |     |     |     |     |     |     |     |     |     |     |     |     |

**Figure S1.** Location of the specific primers and probes. The primers and TaqMan probes were designed basing on the conserved regions of for PRCoV S gene (A), PRRSV N gene (B), SIV M gene (C), and PRV gB gene (D), respectively.
